# Supplementary material for: Studies of electrochemical surface alloying and dealloying by in situ high-speed STM
Source: Royal Society of Chemistry journal article supplement (doi:10.1039/c2cp41023k), 2012-01-01
Supplement: c2cp41023k.pdf [file c2cp41023k.pdf]

## Supporting information

Video 1:

Name: PbCu-alloying\_1

Title: Electrochemical surface alloying and dealloying of Pb in Cu surface

Legend:

Real-time STM video sequence (15 nm × 15 nm) of Cu(100) in Cl-containing electrolyte, showing the formation and subsequent dissolution of the Pb surface during a potential cycle from -0.24 to -0.47 V and back.

Keywords:

STM, dynamics, alloy, electrochemistry, electrodeposition, surface phase formation, Cu, Pb

Video 2:

Name: PbCu-alloying\_2

Title: Electrochemical surface alloying and dealloying of Pb in Cu surface

Legend:

Real-time STM video sequence (16 nm × 16 nm to 13 nm × 13 nm) of Cu(100) in Cl-containing electrolyte, showing the Pb surface alloying and dealloying process during a potential cycle from -0.26 to -0.45 V and back.

Keywords:

STM, dynamics, alloy, electrochemistry, electrodeposition, surface phase formation, Cu, Pb
